# Supplementary material for: Ag nanoparticles supported on a magnetic NiFe2O4/MIL-101(Fe) metal–organic framework nanocomposite for the room temperature rapid catalytic reduction of nitrophenols and nitroanilines
Source: Royal Society of Chemistry journal article supplement (doi:10.1039/d2nj02089k), 2022-01-01
Supplement: d2nj02089k1.pdf [file d2nj02089k1.pdf]

## Ag nanoparticles supported on the magnetic NiFe<sub>2</sub>O<sub>4</sub>/MIL-101(Fe) metal–organic framework nanocomposite for the room temperature catalytic reduction of nitrophenols and nitroanilines

Mirshad Amraee<sup>a</sup>, Saeed Farhadi<sup>a,\*</sup>, Abdelnassar Mohammadi<sup>b</sup>

<sup>a</sup> Department of Chemistry, Lorestan University, Khorramabad, 68151-44316, Iran.

<sup>b</sup> Department of Biology, Lorestan University, Khorramabad, 68151-44316, Iran

Email address: [farhadi.s@lu.ac.ir](mailto:farhadi.s@lu.ac.ir) (S. Farhadi)

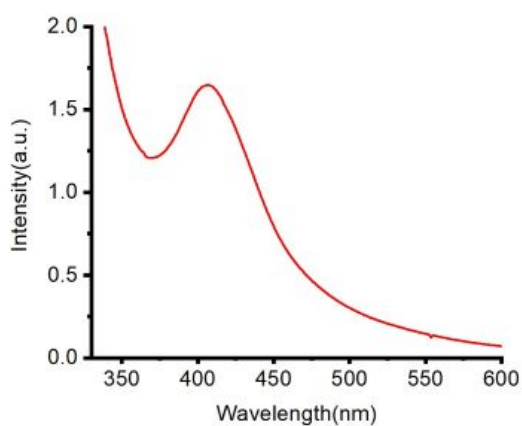

**Fig.S1** .The UV–vis absorption spectrum of the Ag nanoparticle

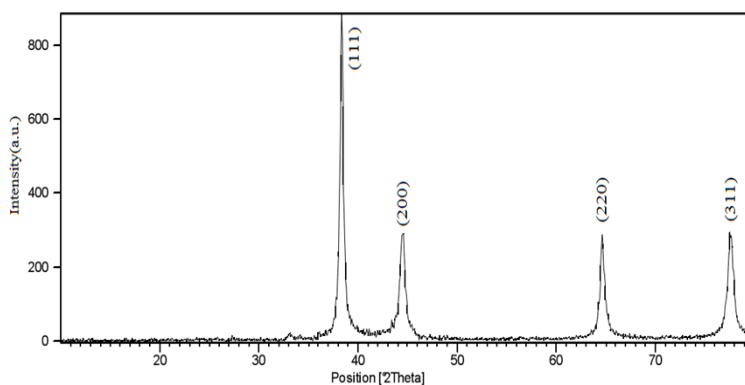

**Fig.S2** .The XRD pattern of thr Ag nanoparticle

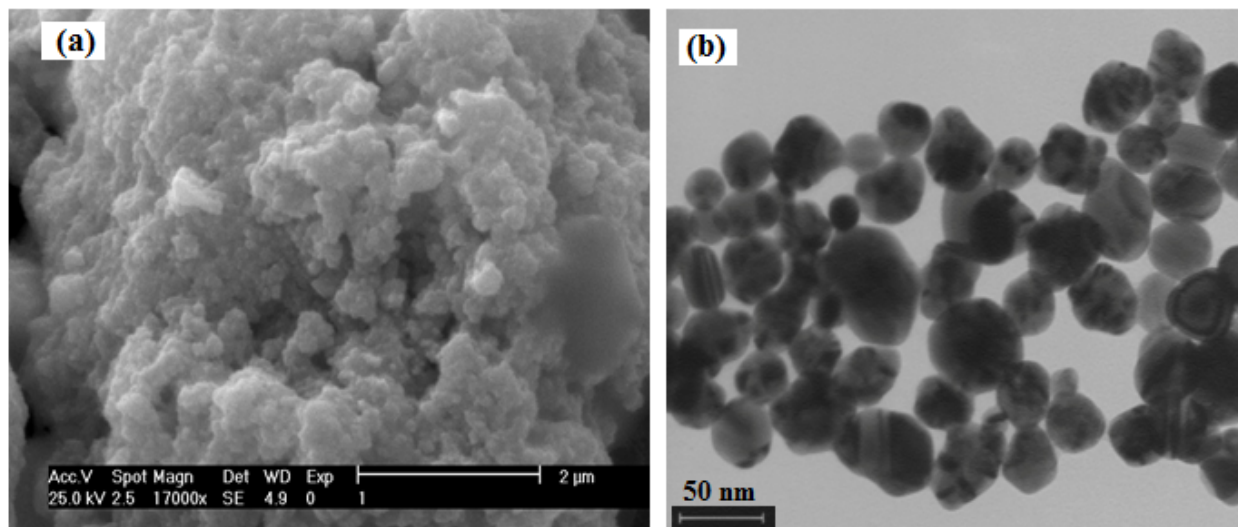

**Fig. S3.** (a) SEM and (b) TEM images of the Ag nanoparticles prepared in this work.

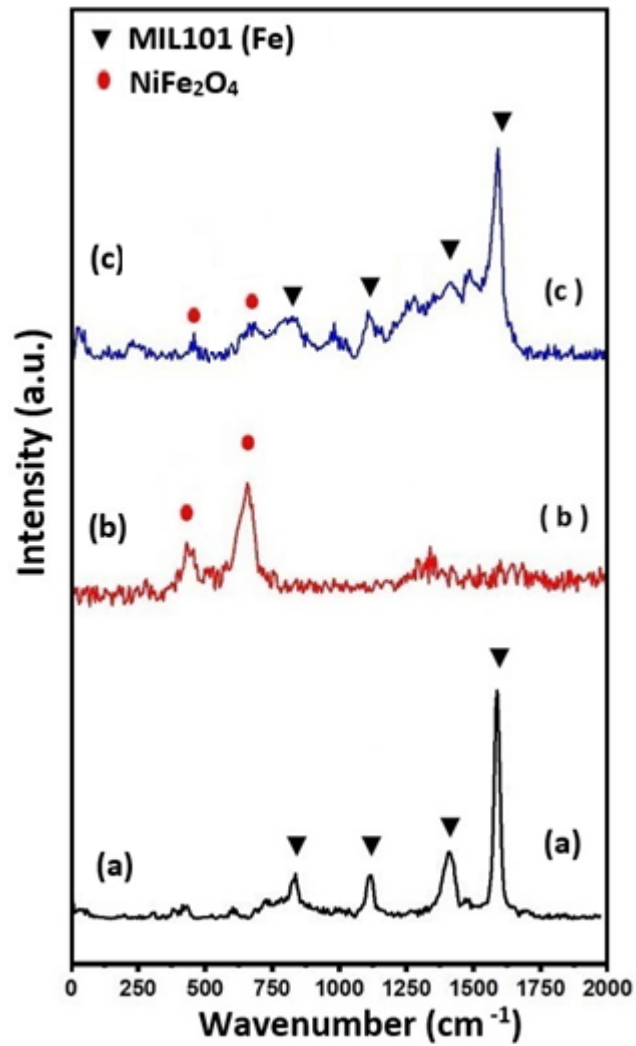

**Fig. S4.** Raman spectra of (a) MIL101(Fe), (b)  $\text{NiFe}_2\text{O}_4$  and (c)  $\text{Ag@NiFe}_2\text{O}_4/\text{MIL101(Fe)}$  nanocomposite

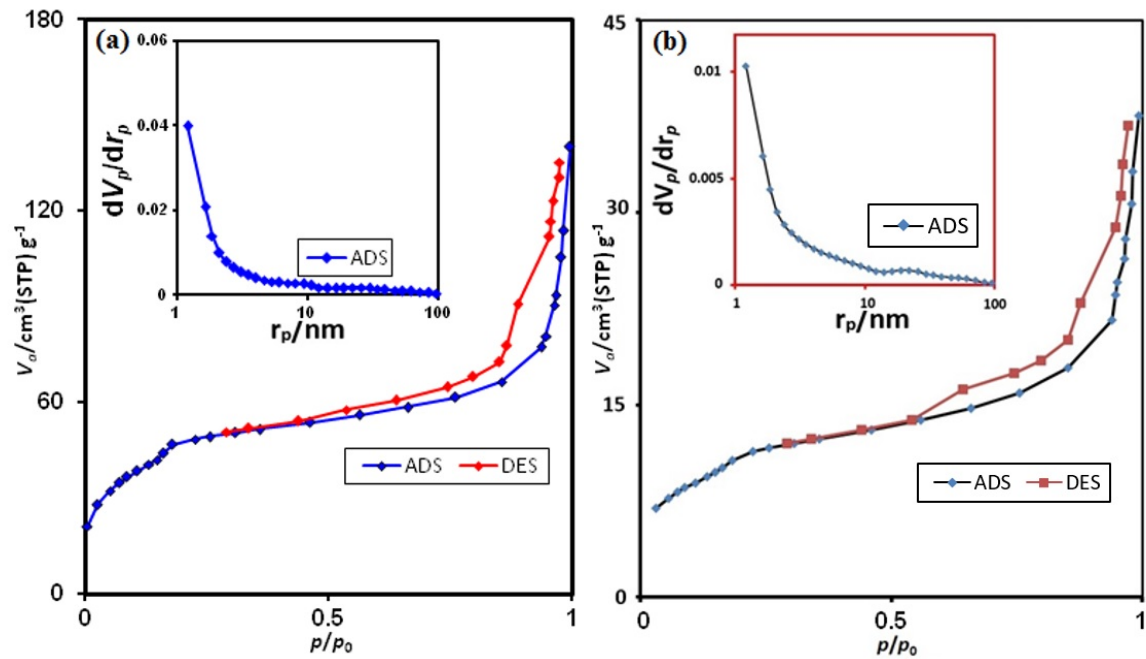

**Fig. 5S.** N<sub>2</sub> adsorption–desorption isotherms and pore-size distribution curve (the inset) of (a) MIL101(Fe) and (b) Ag@NiFe<sub>2</sub>O<sub>4</sub>/MIL101(Fe) nanocomposite.
